# Supplementary material for: S,N-Co-doped carbon nanoparticles with high quantum yield for metal ion detection, IMP logic gates and bioimaging applications
Source: Royal Society of Chemistry journal article supplement (doi:10.1039/c8nj04527e), 2018-01-01
Supplement: c8nj04527e1.pdf [file c8nj04527e1.pdf]

## Electronic Supplementary Information

### **S, N-Co-doped Carbon Nanoparticles with High Quantum Yield for metal ions detection, IMP logic gates and bioimaging Applications**

Jinping Song, Qi Ma <sup>\*</sup>, Sufang Zhang, Huijun Liu, Yong Guo, Feng Feng <sup>\*</sup>

College of Chemistry and Environmental Engineering, and Institute of Applied Chemistry, Shanxi Datong University, Datong, Shanxi, 037009, China

<sup>\*</sup>Corresponding authors: maqihx@163.com (Q. Ma), feng-feng64@263.com (F. Feng)

**Table S1.** Quantum yield of S,N-CNPs prepared under different synthetic conditions.

|   | Reaction temperature/ °C | Reaction time/ h | QYs (%) in water | QYs (%) in ethanol |
|---|--------------------------|------------------|------------------|--------------------|
| 1 | 200                      | 1.0              | 33.59 %          | 5.02 %             |
| 2 | 200                      | 1.5              | 53.35 %          | 42.72 %            |
| 3 | 200                      | 2.0              | 57.35 %          | 43.99 %            |
| 4 | 200                      | 2.5              | 67.02%           | 44.32 %            |
| 5 | 200                      | 3.0              | 62.27 %          | 41.01 %            |
| 6 | 180                      | 2.5              | 41.54 %          | 40.67 %            |
| 7 | <b>220</b>               | <b>2.5</b>       | <b>69.04 %</b>   | <b>43.84 %</b>     |
| 8 | 240                      | 2.5              | 65.32 %          | 41.56 %            |

**Table S2.** Stern–Volmer quenching constants at different temperatures

|                  | pH | T (K) | $K_{sv}$ (L mol <sup>-1</sup> ) | R      |
|------------------|----|-------|---------------------------------|--------|
| Hg <sup>2+</sup> | 6  | 298   | $6.765 \times 10^4$             | 0.9951 |
|                  | 6  | 310   | $5.408 \times 10^4$             | 0.9978 |
|                  | 6  | 318   | $4.024 \times 10^4$             | 0.9784 |
| Ag <sup>+</sup>  | 11 | 298   | $8.859 \times 10^4$             | 0.9903 |
|                  | 11 | 310   | $8.548 \times 10^4$             | 0.9924 |
|                  | 11 | 318   | $7.752 \times 10^4$             | 0.9931 |
| Ni <sup>2+</sup> | 11 | 298   | $1.367 \times 10^4$             | 0.9971 |
|                  | 11 | 310   | $0.846 \times 10^4$             | 0.9977 |
|                  | 11 | 318   | $0.631 \times 10^4$             | 0.9923 |

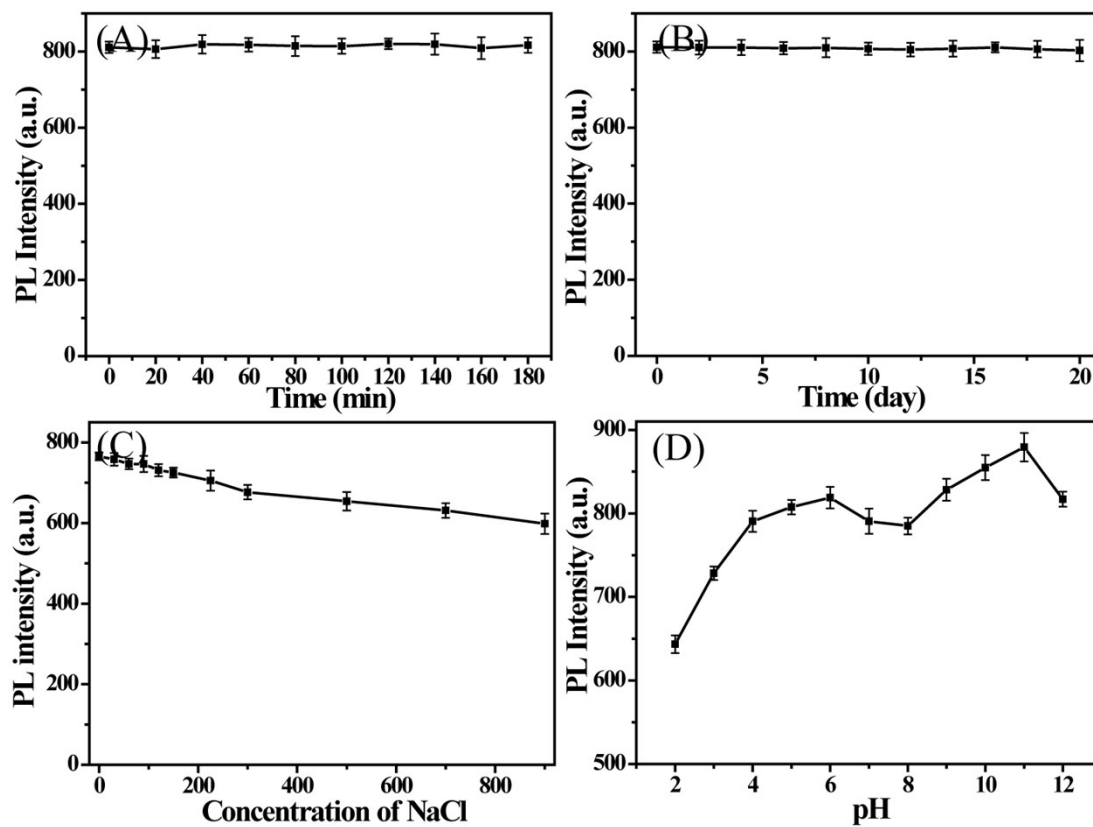

**Figure S1** Stability performance of S, N-CNPs. Effect of UV lamp irradiation (A), storage time (B), ionic strength (C) and pH (D) on the fluorescence intensity of S, N-CNPs.

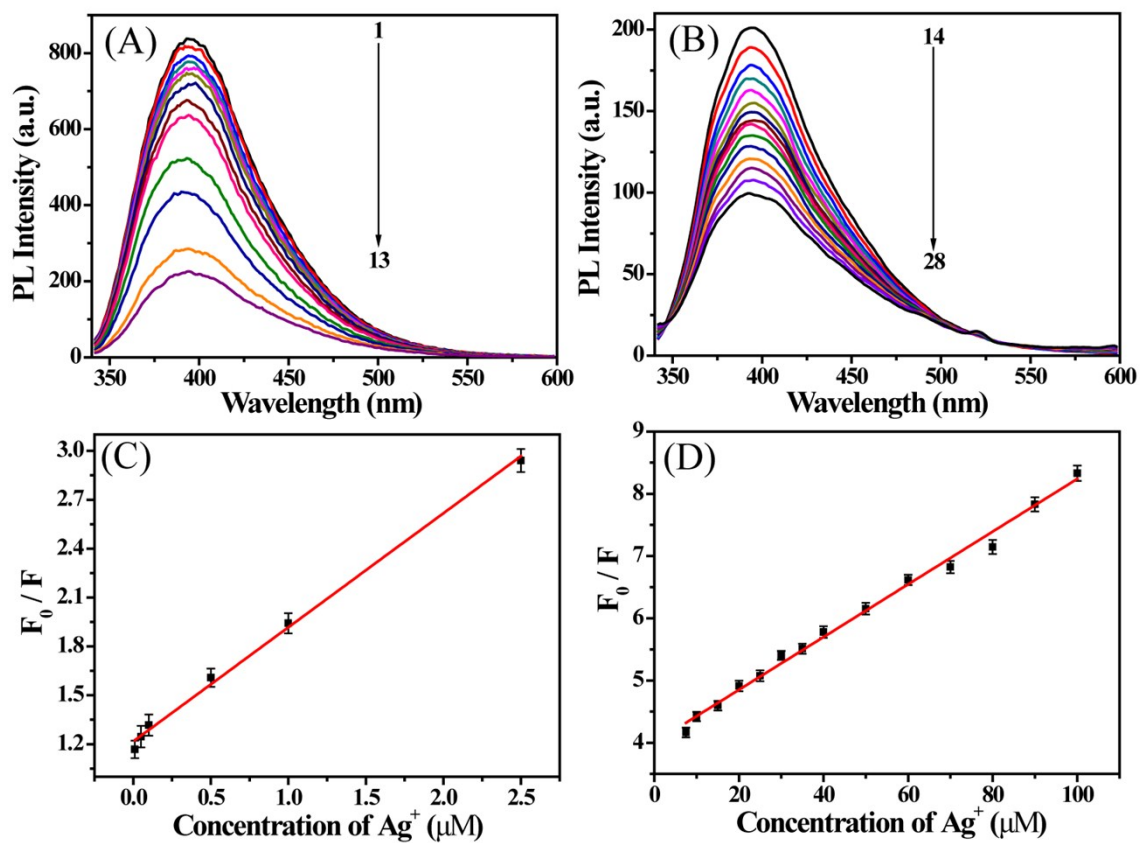

**Figure S2** (A and B) Fluorescence spectra of S, N-CNPs in the presence of different concentration of Ag<sup>+</sup> (1: 0 M; 2 ~ 13:  $1.0 \times 10^{-11}$  M ~  $5.0 \times 10^{-6}$  M; 14 ~ 28:  $7.5 \times 10^{-6}$  M ~  $1.0 \times 10^{-4}$  M) in pH 11 BR buffer solution. (C) The linear plot between F<sub>0</sub>/F and the concentration of Ag<sup>+</sup> in the range of  $1.0 \times 10^{-8}$  ~  $2.5 \times 10^{-6}$  M. (D) The linear plot between F<sub>0</sub>/F and the concentration of Ag<sup>+</sup> in the range of  $7.5 \times 10^{-6}$  ~  $1.0 \times 10^{-4}$  M.

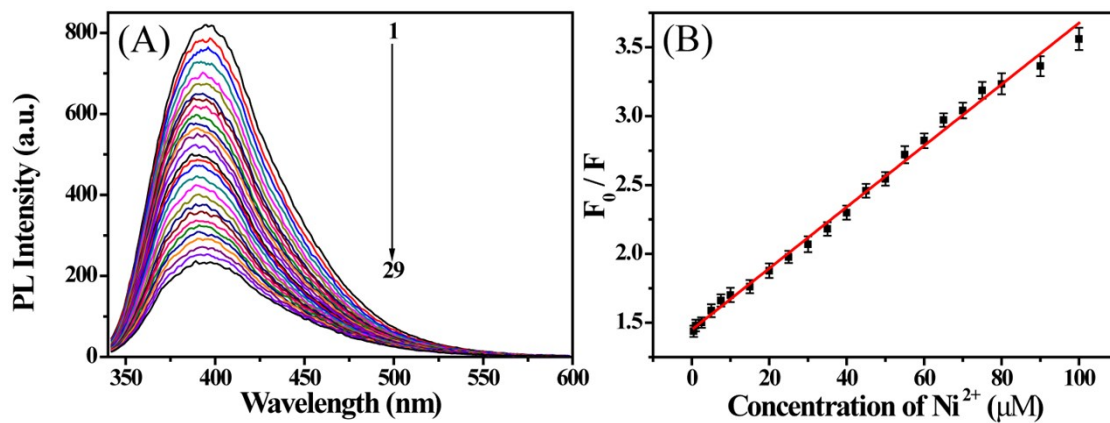

**Figure S3** (A) Fluorescence spectra of S,N-CNPs in the presence of different concentration of Ni<sup>2+</sup> (1: 0 M; 2 ~ 29:  $1.0 \times 10^{-12}$  M ~  $1.0 \times 10^{-4}$  M) in pH 11 BR buffer solution. (B) The linear plot between  $F_0/F$  and the concentration of Ni<sup>2+</sup>.

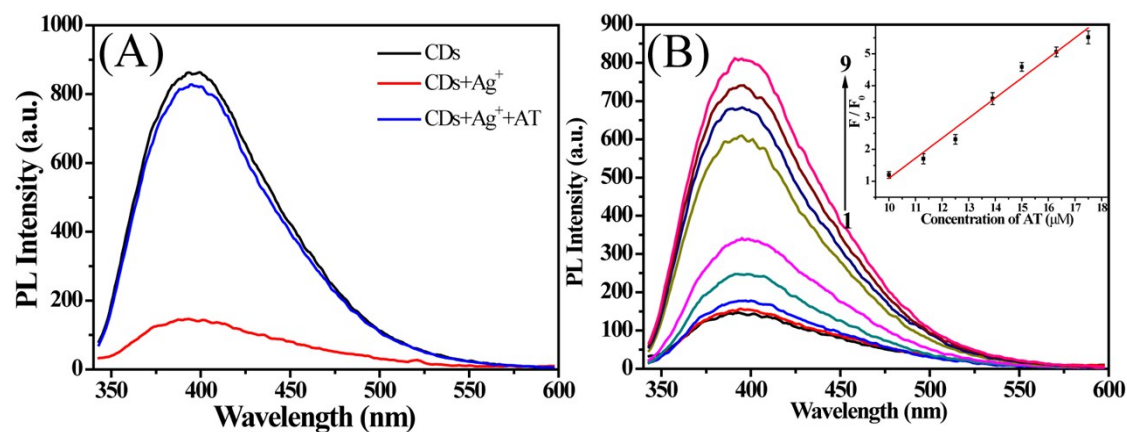

**Figure S4** (A) Fluorescence spectra of S,N-CNPs (black curve), S,N-CNPs+0.1 mM Ag<sup>+</sup> (red curve) and S,N-CNPs+ 0.1 mM Ag<sup>+</sup>+ 20 μM AT (blue curve), respectively. (B) Fluorescence spectra of S,N-CNPs containing 0.1 mM Ag<sup>+</sup> in the absence and presence of different concentration of AT ( $5.0 \times 10^{-6} \sim 2.0 \times 10^{-5}$  M). (Inset) Linear plot between  $F/F_0$  and the concentration of AT. All above experiments were carried out in pH 11 BR buffer solution.

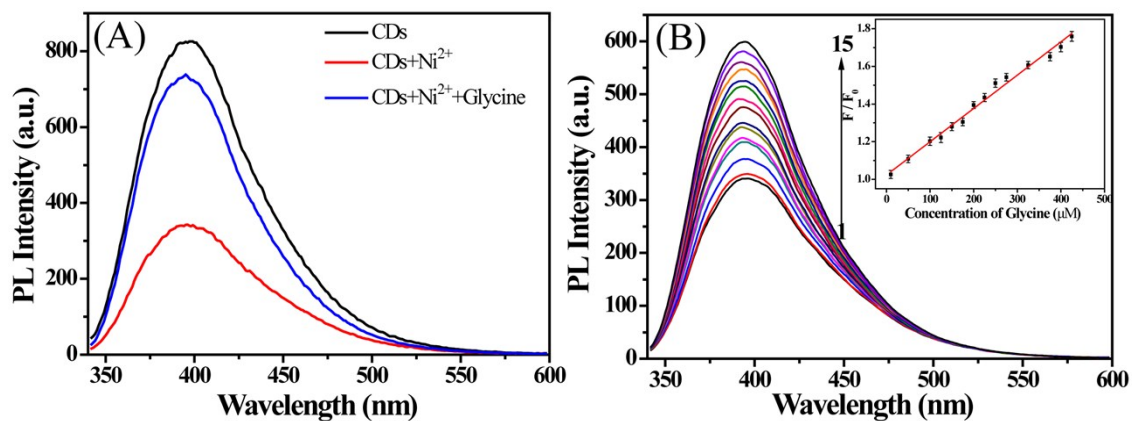

**Figure S5** (A) Fluorescence spectra of S,N-CNPs (black curve), S,N-CNPs+0.1 mM Ni<sup>2+</sup> (red curve) and S,N-CNPs+ 50 μM Ni<sup>2+</sup>+ 1 mM glycine (blue curve), respectively. (B) Fluorescence spectra of S,N-CNPs containing 50 μM Ni<sup>2+</sup> in the absence and presence of different concentration of Ni<sup>2+</sup> (1: 0 M; 2 ~ 15:  $1.0 \times 10^{-5} \sim 4.25 \times 10^{-4}$  M). (B) Linear plot between  $F_0/F$  and the concentration of Ni<sup>2+</sup> in the range of  $1.0 \times 10^{-5} \sim 4.25 \times 10^{-4}$  M. All above experiments were carried out in pH 11 BR buffer solution.

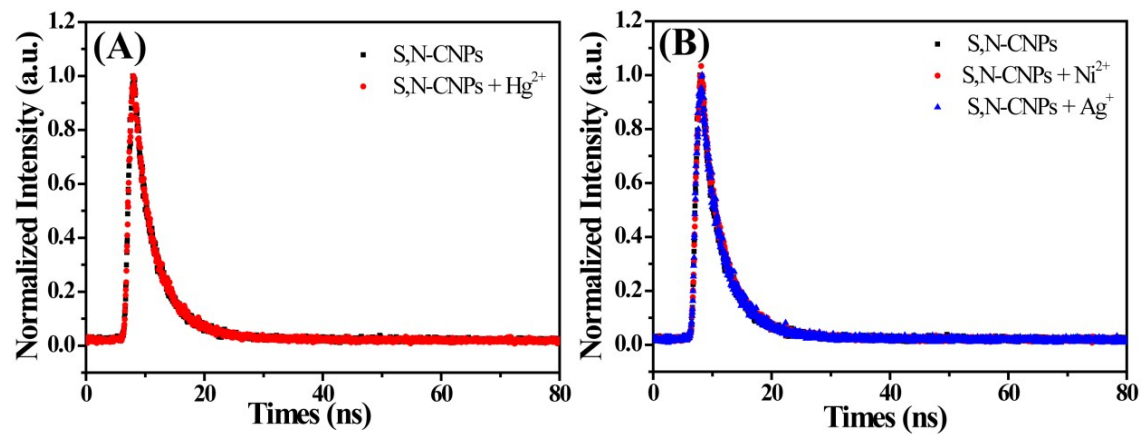

**Figure S6** (A) Lifetime decay of S,N-CNPs, and S,N-CNPs+Hg<sup>2+</sup> in pH 6 BR buffer solution. (B) Lifetime decay of S,N-CNPs, S,N-CNPs+Ni<sup>2+</sup> and S,N-CNPs+Ag<sup>+</sup> in pH 11 BR buffer solution.



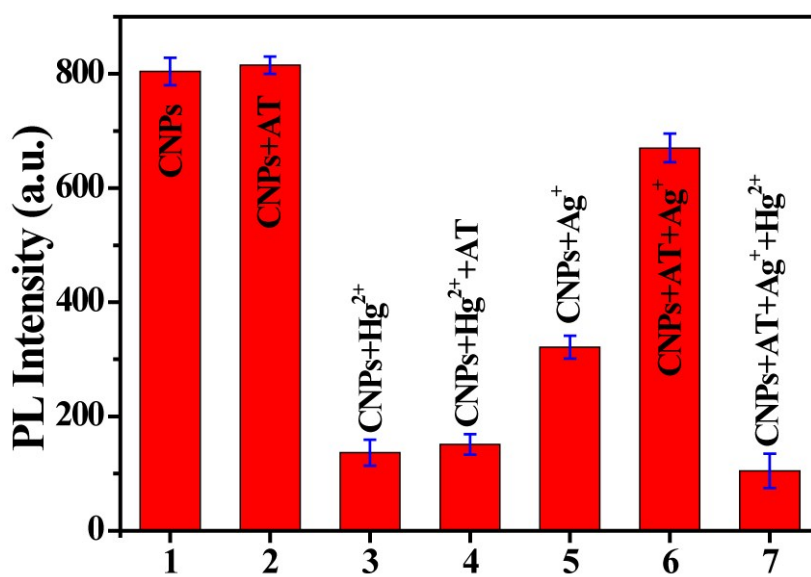

**Figure S7** Fluorescence histogram of (1) S,N-CNPs, (2) S,N-CNPs + 0.1 mM AT, (3) S,N-CNPs + 0.1 mM Hg<sup>2+</sup>, (4) S,N-CNPs + 0.1 mM Hg<sup>2+</sup> + 0.1 mM AT, (5) S,N-CNPs + 50 μM Ag<sup>+</sup>, (6) S,N-CNPs + 50 μM Ag<sup>+</sup> + 0.1 mM AT and (7) S,N-CNPs + 50 μM Ag<sup>+</sup> + 0.1 mM AT + 0.1 mM Hg<sup>2+</sup> in pH 6 buffer solution, respectively.

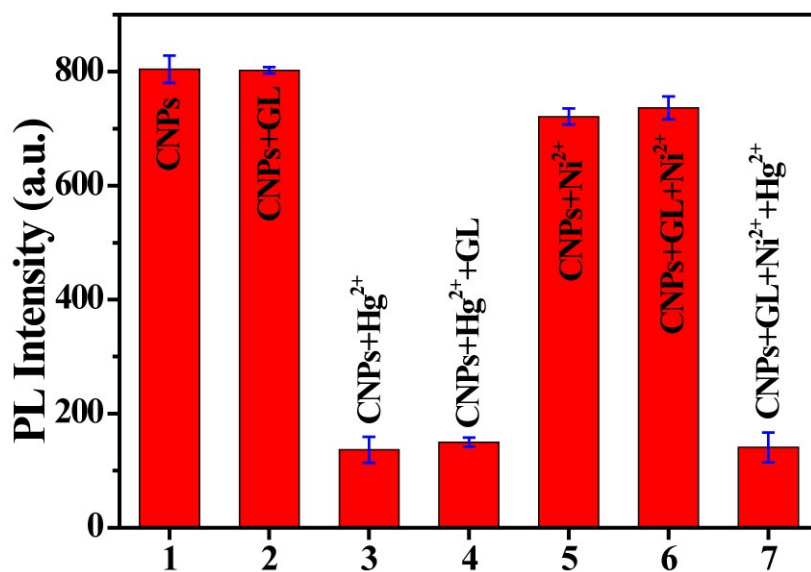

**Figure S8** Fluorescence histogram of (1) S,N-CNPs, (2) S,N-CNPs + 0.1 mM GL, (3) S,N-CNPs + 0.1 mM Hg<sup>2+</sup>, (4) S,N-CNPs + 0.1 mM Hg<sup>2+</sup> + 0.1 mM GL, (5) S,N-CNPs + 0.1 mM Ni<sup>2+</sup>, (6) S,N-CNPs + 0.1 mM Ni<sup>2+</sup> + 0.1 mM GL and (7) S,N-CNPs + 0.1 mM Ni<sup>2+</sup> + 0.1 mM GL + 0.1 mM Hg<sup>2+</sup> in pH 6 buffer solution, respectively.

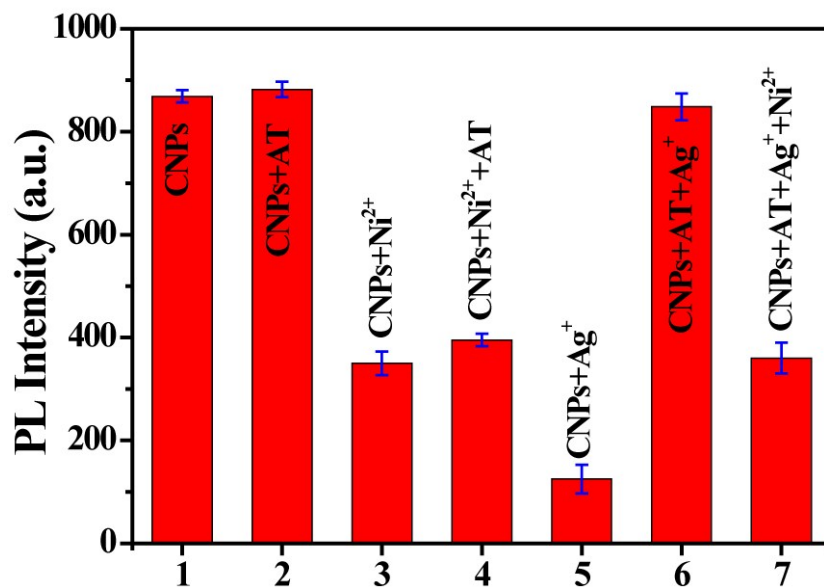

**Figure S9** Fluorescence histogram of (1) S,N-CNPs, (2) S,N-CNPs + 20  $\mu\text{M}$  AT, (3) S,N-CNPs + 50  $\mu\text{M}$  Ni<sup>2+</sup>, (4) S,N-CNPs + 50  $\mu\text{M}$  Ni<sup>2+</sup> + 20  $\mu\text{M}$  AT, (5) S,N-CNPs + 0.1 mM Ag<sup>+</sup>, (6) S,N-CNPs + 0.1 mM Ag<sup>+</sup> + 20  $\mu\text{M}$  AT and (7) S,N-CNPs + 0.1 mM Ag<sup>+</sup> + 20  $\mu\text{M}$  AT + 50  $\mu\text{M}$  Ni<sup>2+</sup> in pH 11 buffer solution, respectively.

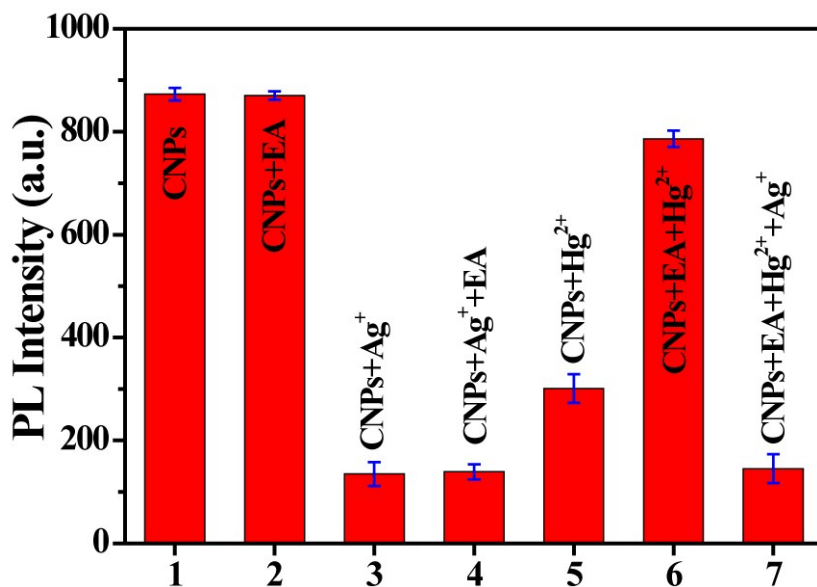

**Figure S10** Fluorescence histogram of (1) S,N-CNPs, (2) S,N-CNPs + 10 mM EA, (3) S,N-CNPs + 0.1 mM Ag<sup>+</sup>, (4) S,N-CNPs + 0.1 mM Ag<sup>+</sup> +10 mM EA, (5) S,N-CNPs + 0.1 mM Hg<sup>2+</sup>, (6) S,N-CNPs + 0.1 mM Hg<sup>2+</sup> + 10 mM EA and (7) S,N-CNPs + 0.1 mM Hg<sup>2+</sup> +10 mM EA + 0.1 mM Ag<sup>+</sup> in pH 11 buffer solution, respectively.

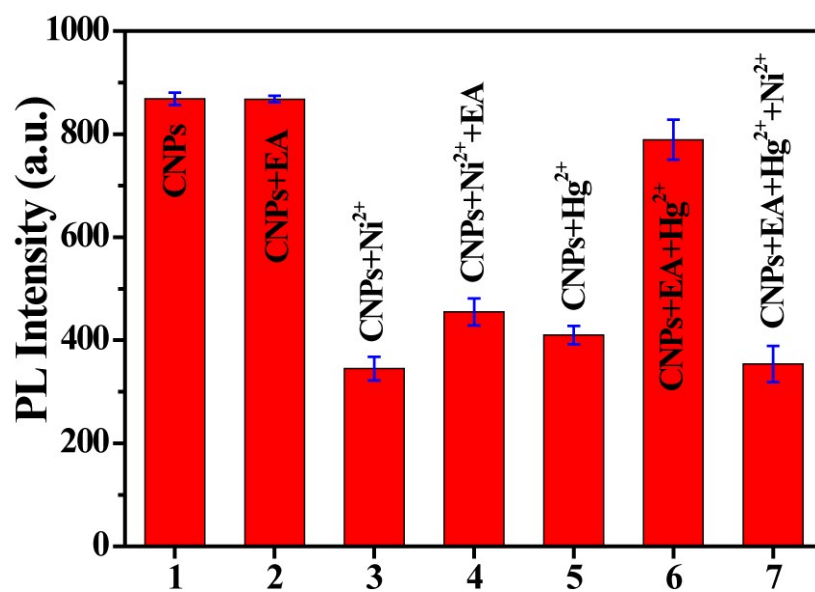

**Figure S11** Fluorescence histogram of (1) S,N-CNPs, (2) S,N-CNPs + 0.2 mM EA, (3) S,N-CNPs + 50  $\mu\text{M}$  Ni<sup>2+</sup>, (4) S,N-CNPs + 50  $\mu\text{M}$  Ni<sup>2+</sup> + 0.2 mM EA, (5) S,N-CNPs + 50  $\mu\text{M}$  Hg<sup>2+</sup>, (6) S,N-CNPs + 50  $\mu\text{M}$  Hg<sup>2+</sup> + 0.2 mM EA and (7) S,N-CNPs + 50  $\mu\text{M}$  Hg<sup>2+</sup> + 0.2 mM EA + 50  $\mu\text{M}$  Ni<sup>2+</sup> in pH 11 buffer solution, respectively.

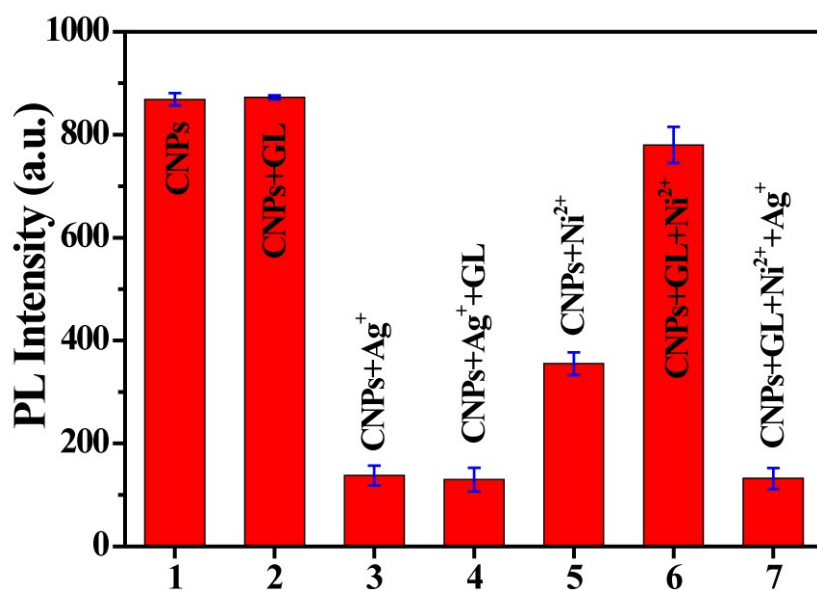

**Figure S12** Fluorescence histogram of (1) S,N-CNPs, (2) S,N-CNPs + 0.5 mM GL, (3) S,N-CNPs + 0.1 mM Ag<sup>+</sup>, (4) S,N-CNPs + 0.1 mM Ag<sup>+</sup> + 0.5 mM GL, (5) S,N-CNPs + 50 μM Ni<sup>2+</sup>, (6) S,N-CNPs + 50 μM Ni<sup>2+</sup> + 0.5 mM GL and (7) S,N-CNPs + 50 μM Ni<sup>2+</sup> + 0.5 mM GL + 0.1 mM Ag<sup>+</sup> in pH 11 buffer solution, respectively.

| Input 1         | Input 2 |    |    | Output |
|-----------------|---------|----|----|--------|
| Ag <sup>+</sup> | AT      | EA | GL | F      |
| 1               | 0       | 0  | 0  | 0      |
| 1               | 1       | 0  | 0  | 1      |
| 1               | 0       | 1  | 0  | 0      |
| 1               | 0       | 0  | 1  | 0      |

**Figure S13** Truth table for IMP logic gate operation (it always keeps Ag<sup>+</sup> as input 1 and changes input 2).

| Input 1         |                  |                  | Input 2 | Output |
|-----------------|------------------|------------------|---------|--------|
| Ag <sup>+</sup> | Hg <sup>2+</sup> | Ni <sup>2+</sup> | AT      | F      |
| 1               | 0                | 0                | 1       | 1      |
| 0               | 1                | 0                | 1       | 0      |
| 0               | 0                | 1                | 1       | 0      |

**Figure S14** Truth table for IMP logic gate operation (it always keeps AT as input 2 and changes input 1).



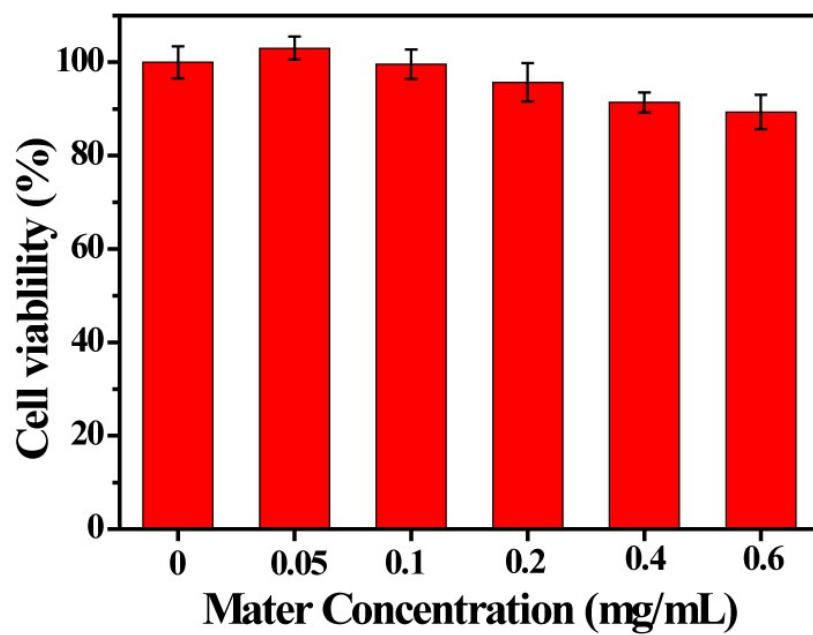

**Figure S15** Cell cytotoxic effect of S,N-CNPs on HeLa cells.
